# Supplementary material
Source: publisher site journal article supplement (https://www.dovepress.com/get_supplementary_file.php?f=435886.docx)
Supplement: Supplementary file 1 [file get_supplementary_file.php]

**Supplementary Material**

**Supplementary Table 1：**Baseline characteristics of study participants in the NHANES 2011-2018 according to weight change patterns from age 25 years to 10 years prior

| Characteristic | Overall, N = 12284 (100%) | Stable Non-Obese, N = 8349 (68%) | Obese to Non-Obese, N = 111 (0.8%) | Non-Obese to Obese, N = 2813 (23%) | Stable Obesity, N = 1011 (8.1%) | P Value |
| --- | --- | --- | --- | --- | --- | --- |
| weight change(kg) | 11 (13) | 7 (7) | -19 (17) | 25 (14) | 12 (18) | <0.001 |
| Age | 58 (12) | 58 (12) | 59 (13) | 61 (11) | 54 (11) | <0.001 |
| Sex |  |  |  |  |  | <0.001 |
| male | 5,975 (48%) | 4,035 (46%) | 59 (49%) | 1,351 (50%) | 530 (56%) |  |
| female | 6,309 (52%) | 4,314 (54%) | 52 (51%) | 1,462 (50%) | 481 (44%) |  |
| Race |  |  |  |  |  | <0.001 |
| Mexican American | 1,520 (6.2%) | 905 (5.6%) | 15 (8.7%) | 455 (7.5%) | 145 (7.5%) |  |
| Non-Hispanic White | 4,890 (71%) | 3,237 (71%) | 54 (72%) | 1,195 (73%) | 404 (70%) |  |
| Non-Hispanic Black | 2,736 (9.7%) | 1,717 (9.0%) | 25 (11%) | 669 (10%) | 325 (15%) |  |
| Other/multiracial | 3,138 (13%) | 2,490 (15%) | 17 (8.7%) | 494 (9.4%) | 137 (8.0%) |  |
| Education level |  |  |  |  |  | 0.057 |
| less than high school | 1,260 (4.9%) | 800 (4.7%) | 16 (7.5%) | 357 (5.9%) | 87 (3.9%) |  |
| High School or GED | 4,279 (31%) | 2,860 (31%) | 48 (43%) | 989 (32%) | 382 (32%) |  |
| College or above | 6,737 (64%) | 4,683 (64%) | 47 (49%) | 1,465 (62%) | 542 (64%) |  |
| FIPR |  |  |  |  |  | <0.001 |
| 0-1.0 | 2,079 (11%) | 1,360 (11%) | 26 (17%) | 477 (11%) | 216 (14%) |  |
| 1.0-3.0 | 4,643 (33%) | 3,066 (32%) | 48 (43%) | 1,140 (36%) | 389 (34%) |  |
| >3.0 | 4,451 (56%) | 3,172 (57%) | 28 (39%) | 940 (53%) | 311 (51%) |  |
| Smoking status |  |  |  |  |  | <0.001 |
| Never smoker | 5,105 (54%) | 3,473 (55%) | 36 (30%) | 1,177 (52%) | 419 (51%) |  |
| Former smoker | 2,713 (30%) | 1,698 (28%) | 25 (25%) | 751 (36%) | 239 (31%) |  |
| Current smoker | 1,662 (16%) | 1,173 (18%) | 31 (45%) | 287 (12%) | 171 (18%) |  |
| Leisure physical activity |  |  |  |  |  | <0.001 |
| 0 times/week | 10,864 (86%) | 7,258 (83%) | 103 (90%) | 2,573 (90%) | 930 (91%) |  |
| 1-2 times/week | 672 (7.1%) | 511 (8.1%) | 3 (4.8%) | 117 (5.2%) | 41 (4.6%) |  |
| ≥3 times/week | 748 (7.4%) | 580 (8.6%) | 5 (4.9%) | 123 (4.9%) | 40 (3.9%) |  |
| HDL (mmol/L) | 1.42 (0.45) | 1.48 (0.47) | 1.36 (0.49) | 1.31 (0.37) | 1.26 (0.36) | <0.001 |
| Total Cholesterol (mmol/L) | 5.11 (1.10) | 5.22 (1.08) | 5.03 (1.27) | 4.89 (1.12) | 4.85 (1.04) | <0.001 |
| Triglyceride (mmol/L) | 1.43 (1.21) | 1.38 (1.30) | 1.31 (0.65) | 1.54 (1.00) | 1.57 (0.98) | <0.001 |
| LDL-C (mmol/L) | 3.01 (0.93) | 3.08 (0.93) | 3.18 (1.18) | 2.82 (0.93) | 2.89 (0.89) | <0.001 |
| Glucose (mmol/L) | 6.23 (1.93) | 5.97 (1.58) | 5.97 (1.11) | 6.70 (2.19) | 7.25 (3.08) | <0.001 |
| HbA1c(%) | 5.83 (1.02) | 5.69 (0.80) | 5.79 (0.94) | 6.12 (1.25) | 6.26 (1.53) | <0.001 |
| eGFR(ml/min/1.73m2) | 92 (32) | 93 (31) | 92 (33) | 89 (33) | 96 (34) | <0.001 |
| Scr (umol/L) | 80 (31) | 79 (29) | 80 (24) | 82 (32) | 82 (41) | 0.023 |
| BUN (mmol/L) | 5.37 (2.05) | 5.27 (1.92) | 5.59 (1.93) | 5.61 (2.28) | 5.56 (2.30) | <0.001 |
| ACR (mg/g) | 40 (296) | 30 (231) | 18 (31) | 60 (372) | 77 (493) | <0.001 |
| diabetes | 2,982 (18%) | 1,438 (12%) | 33 (18%) | 1,101 (32%) | 410 (35%) | <0.001 |
| hypertension | 5,921 (44%) | 3,484 (37%) | 66 (60%) | 1,750 (57%) | 621 (56%) | <0.001 |
| Cardiovascular diseases | 1,233 (8.7%) | 663 (7.0%) | 21 (15%) | 395 (12%) | 154 (12%) | <0.001 |
| Stroke | 636 (3.9%) | 374 (3.3%) | 8 (6.8%) | 192 (5.4%) | 62 (4.4%) | <0.001 |
| Chronic bronchitis | 839 (7.0%) | 495 (6.4%) | 18 (20%) | 230 (8.0%) | 96 (8.5%) | <0.001 |
| COPD | 527 (5.4%) | 319 (4.9%) | 12 (13%) | 149 (6.5%) | 47 (5.1%) | 0.016 |
| CKD | 2,893 (19%) | 1,689 (17%) | 35 (24%) | 840 (25%) | 329 (24%) | <0.001 |
| Cancer | 1,608 (15%) | 1,046 (15%) | 14 (14%) | 443 (17%) | 105 (11%) | 0.01 |

Data are given as median (sd) for continuous; n (%) for categorical；For categorical variables, P value was calculated by Rao-Scottχ2 test, which is design adjusted version of Pearsonχ2 test. For continuous variables,Wilcoxon rank-sum test was used to calculate P value.

Abbreviations:FIPR, family poverty income ratio; HDL-C, high density lipoprotein-cholesterol; LDL-C,low density lipoprotein-cholesterol;SCr, serum creatinine; BUN, Blood urea nitrogen;ACR, albumin: creatinine ratio; CVD,cardiovascular disease; CKD, chronic kidney disease;COPD,chronic obstructive pulmonary disease

**Supplementary Table 2：**Baseline characteristics of study participants in the NHANES 2011-2018 according to weight change patterns from 10 years prior to baseline

| **Characteristic** | Overall, N = 12284 (100%) | Stable Non-Obese, N = 6460 (53%) | Obese to Non-Obese, N = 804 (5.7%) | Non-Obese to Obese, N = 2000 (16%) | Stable Obesity, N = 3020 (25%) | P Value |
| --- | --- | --- | --- | --- | --- | --- |
| weight change(kg) | 4 (13) | 2 (7) | -17 (13) | 18 (11) | 3 (17) | <0.001 |
| Age | 58 (12) | 58 (12) | 62 (12) | 56 (11) | 58 (11) | <0.001 |
| Sex |  |  |  |  |  | <0.001 |
| male | 5,975 (48%) | 3,305 (47%) | 467 (56%) | 789 (41%) | 1,414 (50%) |  |
| female | 6,309 (52%) | 3,155 (53%) | 337 (44%) | 1,211 (59%) | 1,606 (50%) |  |
| Race |  |  |  |  |  | <0.001 |
| Mexican American | 1,520 (6.6%) | 630 (5.2%) | 146 (9.1%) | 290 (8.6%) | 454 (7.6%) |  |
| Non-Hispanic White | 4,890 (75%) | 2,580 (76%) | 333 (76%) | 711 (71%) | 1,266 (75%) |  |
| Non-Hispanic Black | 2,736 (10%) | 1,173 (8.0%) | 165 (9.7%) | 569 (14%) | 829 (12%) |  |
| Other/multiracial | 1,838 (8.3%) | 1,419 (11%) | 70 (5.1%) | 161 (5.7%) | 188 (4.9%) |  |
| Education level |  |  |  |  |  | <0.001 |
| less than high school | 1,260 (4.9%) | 632 (4.8%) | 121 (7.5%) | 184 (4.6%) | 323 (4.9%) |  |
| High School or GED | 4,279 (31%) | 2,148 (30%) | 305 (34%) | 760 (36%) | 1,066 (31%) |  |
| College or above | 6,737 (64%) | 3,676 (66%) | 376 (59%) | 1,054 (59%) | 1,631 (64%) |  |
| FIPR |  |  |  |  |  | <0.001 |
| 0-1.0 | 2,079 (11%) | 998 (9.9%) | 167 (15%) | 388 (13%) | 526 (11%) |  |
| 1.0-3.0 | 4,643 (33%) | 2,344 (31%) | 330 (37%) | 770 (36%) | 1,199 (35%) |  |
| >3.0 | 4,451 (56%) | 2,543 (59%) | 224 (48%) | 657 (51%) | 1,027 (54%) |  |
| Smoke status |  |  |  |  |  | <0.001 |
| Never smoker | 5,105 (54%) | 2,685 (55%) | 296 (49%) | 824 (53%) | 1,300 (53%) |  |
| Former smoker | 2,713 (30%) | 1,291 (27%) | 199 (31%) | 432 (30%) | 791 (35%) |  |
| Current smoker | 1,662 (16%) | 936 (18%) | 142 (20%) | 268 (17%) | 316 (12%) |  |
| Leisure physical activity |  |  |  |  |  | <0.001 |
| 0 times/week | 10,864 (86%) | 5,554 (81%) | 718 (86%) | 1,807 (91%) | 2,785 (91%) |  |
| 1-2 times/week | 672 (7.1%) | 427 (9.2%) | 37 (7.4%) | 87 (4.2%) | 121 (4.5%) |  |
| ≥3 times/week | 748 (7.4%) | 479 (9.8%) | 49 (6.5%) | 106 (4.6%) | 114 (4.2%) |  |
| HDL (mmol/L) | 1.42 (0.45) | 1.53 (0.49) | 1.39 (0.39) | 1.30 (0.36) | 1.27 (0.36) | <0.001 |
| Total Cholesterol (mmol/L) | 5.11 (1.10) | 5.21 (1.07) | 4.75 (1.04) | 5.26 (1.10) | 4.91 (1.11) | <0.001 |
| Triglyceride (mmol/L) | 1.43 (1.21) | 1.28 (1.02) | 1.40 (0.89) | 1.73 (1.92) | 1.58 (1.01) | <0.001 |
| LDL-C (mmol/L) | 3.01 (0.93) | 3.05 (0.92) | 2.84 (0.92) | 3.19 (0.94) | 2.84 (0.93) | <0.001 |
| Glucose (mmol/L) | 6.23 (1.93) | 5.85 (1.43) | 6.53 (2.40) | 6.40 (1.95) | 6.91 (2.46) | <0.001 |
| HbA1c(%) | 5.83 (1.02) | 5.62 (0.74) | 6.03 (1.40) | 5.90 (0.94) | 6.18 (1.31) | <0.001 |
| eGFR(ml/min/1.73m2) | 85 (19) | 85 (18) | 81 (22) | 86 (19) | 84 (20) | 0.004 |
| Scr (umol/L) | 80 (31) | 79 (30) | 85 (43) | 79 (25) | 82 (32) | 0.014 |
| BUN (mmol/L) | 5.37 (2.05) | 5.29 (1.92) | 5.74 (2.47) | 5.20 (1.94) | 5.56 (2.24) | <0.001 |
| ACR (mg/g) | 40 (296) | 28 (232) | 73 (406) | 35 (221) | 63 (408) | <0.001 |
| diabetes | 2,982 (18%) | 979 (9.5%) | 292 (30%) | 492 (20%) | 1,219 (34%) | <0.001 |
| hypertension | 5,921 (44%) | 2,494 (34%) | 475 (56%) | 1,056 (50%) | 1,896 (57%) | <0.001 |
| Cardiovascular diseases | 1,233 (8.7%) | 505 (6.5%) | 129 (13%) | 179 (8.9%) | 420 (12%) | <0.001 |
| Stroke | 636 (3.9%) | 286 (3.3%) | 67 (5.9%) | 96 (3.5%) | 187 (5.0%) | 0.002 |
| Chronic bronchitis | 839 (7.0%) | 333 (5.6%) | 67 (9.6%) | 180 (9.6%) | 259 (7.8%) | <0.001 |
| COPD | 527 (5.4%) | 236 (4.8%) | 53 (8.6%) | 95 (5.9%) | 143 (5.5%) | 0.052 |
| CKD | 2,893 (19%) | 1,295 (16%) | 269 (27%) | 429 (20%) | 900 (24%) | <0.001 |
| Cancer | 1,608 (15%) | 849 (16%) | 145 (19%) | 211 (12%) | 403 (15%) | 0.01 |

Data are given as median (sd) for continuous; n (%) for categorical；For categorical variables, P value was calculated by Rao-Scottχ2 test, which is design adjusted version of Pearsonχ2 test. For continuous variables,Wilcoxon rank-sum test was used to calculate P value.

Abbreviations:FIPR, family poverty income ratio; HDL-C, high density lipoprotein-cholesterol; LDL-C,low density lipoprotein-cholesterol;SCr, serum creatinine; BUN, Blood urea nitrogen;ACR, albumin: creatinine ratio; CVD,cardiovascular disease; CKD, chronic kidney disease;COPD,chronic obstructive pulmonary disease

**Supplementary Table 3:** association between CKD and BMI status at different time points in the NHANES 2011-2018

|  | **Baseline** | | | | **10 years before baseline** | | | | **age 25 years** | | | |
| --- | --- | --- | --- | --- | --- | --- | --- | --- | --- | --- | --- | --- |
| **Group** | **Characteristic** | **OR** | **95% CI** | **p** | **Characteristic** | **OR** | **95% CI** | **p** | **Characteristic** | **OR** | **95% CI** | **p** |
| model1 | nornal weight | rf | rf |  | nornal weight | rf | rf |  | nornal weight | rf | rf |  |
|  | underweight | 1.69 | 0.90, 3.18 | 0.1 | underweight | 0.52 | 0.24, 1.15 | 0.11 | underweight | 0.7 | 0.48, 1.03 | 0.073 |
|  | overweight | 1.15 | 0.96, 1.37 | 0.13 | overweight | 1.4 | 1.17, 1.66 | <0.001 | overweight | 1.05 | 0.92, 1.19 | 0.5 |
|  | Obesity | 1.52 | 1.33, 1.73 | <0.001 | Obesity | 1.91 | 1.61, 2.26 | <0.001 | Obesity | 1.38 | 1.14, 1.68 | 0.002 |
| model2 | nornal weight | rf | rf |  | nornal weight | rf | rf |  | nornal weight | rf | rf |  |
|  | underweight | 0.95 | 0.34, 2.70 | >0.9 | underweight | 0.36 | 0.13, 1.04 | 0.059 | underweight | 0.73 | 0.45, 1.18 | 0.2 |
|  | overweight | 1.2 | 0.95, 1.52 | 0.12 | overweight | 1.31 | 1.04, 1.65 | 0.024 | overweight | 1.17 | 0.96, 1.42 | 0.12 |
|  | Obesity | 1.67 | 1.38, 2.02 | <0.001 | Obesity | 1.82 | 1.45, 2.29 | <0.001 | Obesity | 1.73 | 1.28, 2.33 | <0.001 |
| model3 | nornal weight | rf | rf |  | nornal weight | rf | rf |  | nornal weight | rf | rf |  |
|  | underweight | 0.96 | 0.34, 2.72 | >0.9 | underweight | 0.39 | 0.14, 1.11 | 0.077 | underweight | 0.71 | 0.42, 1.20 | 0.2 |
|  | overweight | 1.02 | 0.81, 1.30 | 0.8 | overweight | 1.07 | 0.84, 1.36 | 0.5 | overweight | 0.98 | 0.78, 1.22 | 0.8 |
|  | Obesity | 1.11 | 0.90, 1.36 | 0.3 | Obesity | 1.2 | 0.94, 1.53 | 0.14 | Obesity | 1.22 | 0.90, 1.65 | 0.2 |

Abbreviations:95% CI: 95% confidence interval;OR: odd ratio; rf:reference. Model 1: no covariates were adjusted.Model 2: adjusted for covariates including gender, age, race/ethnicity, education level, poverty level, smoking status, and physical activity level; Model 3: further adjusted for comorbidities including diabetes mellitus, hypertension, and cardiovascular disease

**Supplementary Table 4:**association between CKD and weight change patterns across adulthood in NHANES 2011-2018

|  | **age 25 years to baseline** | | | | **age 25 years to 10 years before baseline** | | | | **10 years before baseline to baseline** | | | |
| --- | --- | --- | --- | --- | --- | --- | --- | --- | --- | --- | --- | --- |
| **Group** | **Characteristic** | **OR** | **95% CI** | **p** | **Characteristic** | **OR** | **95% CI** | **p** | **Characteristic** | **OR** | **95% CI** | **p** |
| model1 |  |  |  |  |  |  |  |  |  |  |  |  |
|  | Stable Non-Obese | ref | ref |  | Stable Non-Obese | ref | ref |  | Stable Non-Obese | ref | ref |  |
|  | Obese to Non-Obese | 1.8 | 1.21, 2.69 | 0.004 | Obese to Non-Obese | 1.53 | 0.90, 2.60 | 0.11 | Obese to Non-Obese | 1.97 | 1.55, 2.50 | <0.001 |
|  | Non-Obese to Obese | 1.39 | 1.24, 1.56 | <0.001 | Non-Obese to Obese | 1.62 | 1.41, 1.86 | <0.001 | Non-Obese to Obese | 1.29 | 1.09, 1.54 | 0.005 |
|  | Stable Obesity | 1.52 | 1.23, 1.88 | <0.001 | Stable Obesity | 1.57 | 1.28, 1.94 | <0.001 | Stable Obesity | 1.65 | 1.47, 1.85 | <0.001 |
| model2 |  |  |  |  |  |  |  |  |  |  |  |  |
|  | Stable Non-Obese | ref | ref |  | Stable Non-Obese | ref | ref |  | Stable Non-Obese | ref | ref |  |
|  | Obese to Non-Obese | 1.53 | 0.89, 2.64 | 0.12 | Obese to Non-Obese | 1.36 | 0.64, 2.87 | 0.4 | Obese to Non-Obese | 1.66 | 1.24, 2.22 | 0.001 |
|  | Non-Obese to Obese | 1.41 | 1.22, 1.63 | <0.001 | Non-Obese to Obese | 1.47 | 1.24, 1.75 | <0.001 | Non-Obese to Obese | 1.38 | 1.10, 1.73 | 0.008 |
|  | Stable Obesity | 2 | 1.48, 2.70 | <0.001 | Stable Obesity | 1.92 | 1.42, 2.60 | <0.001 | Stable Obesity | 1.72 | 1.48, 2.01 | <0.001 |
| model3 |  |  |  |  |  |  |  |  |  |  |  |  |
|  | Stable Non-Obese | ref | ref |  | Stable Non-Obese | ref | ref |  | Stable Non-Obese | ref | ref |  |
|  | Obese to Non-Obese | 1.14 | 0.65, 2.00 | 0.6 | Obese to Non-Obese | 1.11 | 0.55, 2.24 | 0.8 | Obese to Non-Obese | 1.26 | 0.95, 1.67 | 0.11 |
|  | Non-Obese to Obese | 1.05 | 0.89, 1.24 | 0.5 | Non-Obese to Obese | 1.09 | 0.91, 1.32 | 0.3 | Non-Obese to Obese | 1.09 | 0.86, 1.40 | 0.5 |
|  | Stable Obesity | 1.3 | 0.95, 1.77 | 0.1 | Stable Obesity | 1.3 | 0.96, 1.77 | 0.091 | Stable Obesity | 1.15 | 0.97, 1.37 | 0.11 |

Abbreviations:95% CI: 95% confidence interval;OR: odd ratio; rf:reference. Model 1: no covariates were adjusted.Model 2: adjusted for covariates including gender, age, race/ethnicity, education level, poverty level, smoking status, and physical activity level; Model 3: further adjusted for comorbidities including diabetes mellitus, hypertension, and cardiovascular disease

**Supplementary Table 5:** association between CKD and weight change patterns stratified by sex, age and recreational physical activity

|  | **Age 25 years to baseline** | | | | **Ten years before baseline to baseline** | | | | **Age 25 years to 10 years before baseline** | | | |
| --- | --- | --- | --- | --- | --- | --- | --- | --- | --- | --- | --- | --- |
| **Group** | **Characteristic** | **ORs** | 95% CI | **p** | **Characteristic** | **ORs** | 95% CI | **p** | **Characteristic** | **ORs** | 95% CI | **p** |
| Male | Stable Non-Obese | rf | rf |  | Stable Non-Obese | rf | rf |  | Stable Non-Obese | rf | rf |  |
|  | Obese to Non-Obese | 1.07 | 0.94, 1.22 | 0.3 | Obese to Non-Obese | 1.15 | 1.07, 1.23 | <0.001 | Obese to Non-Obese | 1.01 | 0.89, 1.14 | >0.9 |
|  | Non-Obese to Obese | 1.05 | 1.03, 1.08 | <0.001 | Non-Obese to Obese | 1.04 | 1.01, 1.08 | 0.009 | Non-Obese to Obese | 1.09 | 1.05, 1.13 | <0.001 |
|  | Stable Obesity | 1.06 | 1.00, 1.12 | 0.041 | Stable Obesity | 1.08 | 1.05, 1.12 | <0.001 | Stable Obesity | 1.07 | 1.01, 1.13 | 0.025 |
| Female | Stable Non-Obese | rf | rf |  | Stable Non-Obese | rf | rf |  | Stable Non-Obese | rf | rf |  |
|  | Obese to Non-Obese | 1.13 | 1.03, 1.24 | 0.012 | Obese to Non-Obese | 1.1 | 1.04, 1.17 | 0.001 | Obese to Non-Obese | 1.07 | 0.97, 1.18 | 0.2 |
|  | Non-Obese to Obese | 1.05 | 1.02, 1.08 | 0.002 | Non-Obese to Obese | 1.03 | 0.99, 1.07 | 0.2 | Non-Obese to Obese | 1.08 | 1.06, 1.11 | <0.001 |
|  | Stable Obesity | 1.08 | 1.02, 1.14 | 0.01 | Stable Obesity | 1.08 | 1.05, 1.12 | <0.001 | Stable Obesity | 1.08 | 1.04, 1.12 | <0.001 |
| 40-59years | Stable Non-Obese | rf | rf |  | Stable Non-Obese | rf | rf |  | Stable Non-Obese | rf | rf |  |
|  | Obese to Non-Obese | 1.09 | 0.98, 1.20 | 0.1 | Obese to Non-Obese | 1.04 | 0.99, 1.09 | 0.1 | Obese to Non-Obese | 1.14 | 0.99, 1.30 | 0.06 |
|  | Non-Obese to Obese | 1.06 | 1.03, 1.09 | <0.001 | Non-Obese to Obese | 1.07 | 1.03, 1.11 | <0.001 | Non-Obese to Obese | 1.03 | 1.01, 1.06 | 0.012 |
|  | Stable Obesity | 1.12 | 1.08, 1.16 | <0.001 | Stable Obesity | 1.07 | 1.05, 1.10 | <0.001 | Stable Obesity | 1.09 | 1.05, 1.13 | <0.001 |
| 60-79 years | Stable Non-Obese | rf | rf |  | Stable Non-Obese | rf | rf |  | Stable Non-Obese | rf | rf |  |
|  | Obese to Non-Obese | 1.07 | 0.94, 1.20 | 0.3 | Obese to Non-Obese | 1.1 | 1.02, 1.19 | 0.014 | Obese to Non-Obese | 0.92 | 0.79, 1.07 | 0.3 |
|  | Non-Obese to Obese | 1.07 | 1.03, 1.11 | <0.001 | Non-Obese to Obese | 1.05 | 0.99, 1.12 | 0.11 | Non-Obese to Obese | 1.08 | 1.04, 1.13 | <0.001 |
|  | Stable Obesity | 1.11 | 1.00, 1.22 | 0.046 | Stable Obesity | 1.1 | 1.06, 1.15 | <0.001 | Stable Obesity | 1.12 | 1.02, 1.23 | 0.018 |
| >=80 years | Stable Non-Obese | rf | rf |  | Stable Non-Obese | rf | rf |  | Stable Non-Obese | rf | rf |  |
|  | Obese to Non-Obese | 1.2 | 0.99, 1.44 | 0.059 | Obese to Non-Obese | 1.15 | 1.04, 1.29 | 0.009 | Obese to Non-Obese | 0.99 | 0.72, 1.37 | >0.9 |
|  | Non-Obese to Obese | 1.08 | 0.99, 1.17 | 0.089 | Non-Obese to Obese | 1.06 | 0.90, 1.26 | 0.4 | Non-Obese to Obese | 1.1 | 1.02, 1.19 | 0.016 |
|  | Stable Obesity | 1.02 | 0.84, 1.24 | 0.8 | Stable Obesity | 1.09 | 1.00, 1.20 | 0.06 | Stable Obesity | 1.14 | 0.98, 1.32 | 0.09 |
| 0 times/week | Stable Non-Obese | rf | rf |  | Stable Non-Obese | rf | rf |  | Stable Non-Obese | rf | rf |  |
|  | Obese to Non-Obese | 1.12 | 1.03, 1.22 | 0.009 | Obese to Non-Obese | 1.15 | 0.93, 1.43 | 0.2 | Obese to Non-Obese | 1.08 | 0.98, 1.20 | 0.12 |
|  | Non-Obese to Obese | 1.05 | 1.03, 1.07 | <0.001 | Non-Obese to Obese | 1.09 | 1.05, 1.13 | <0.001 | Non-Obese to Obese | 1.08 | 1.06, 1.11 | <0.001 |
|  | Stable Obesity | 1.06 | 1.01, 1.10 | 0.009 | Stable Obesity | 1.09 | 1.02, 1.16 | 0.009 | Stable Obesity | 1.07 | 1.03, 1.11 | 0.002 |
| 1-2 times/week | Stable Non-Obese | rf | rf |  | Stable Non-Obese | rf | rf |  | Stable Non-Obese | rf | rf |  |
|  | Obese to Non-Obese | 0.89 | 0.85, 0.92 | <0.001 | Obese to Non-Obese | 1.27 | 1.01, 1.59 | 0.043 | Obese to Non-Obese | 0.89 | 0.85, 0.92 | <0.001 |
|  | Non-Obese to Obese | 0.99 | 0.92, 1.07 | 0.8 | Non-Obese to Obese | 1.09 | 1.04, 1.14 | <0.001 | Non-Obese to Obese | 0.99 | 0.91, 1.07 | 0.8 |
|  | Stable Obesity | 0.94 | 0.88, 1.00 | 0.039 | Stable Obesity | 1.08 | 1.00, 1.17 | 0.064 | Stable Obesity | 0.93 | 0.88, 0.98 | 0.013 |
| ≥3 times/week | Stable Non-Obese | rf | rf |  | Stable Non-Obese | rf | rf |  | Stable Non-Obese | rf | rf |  |
|  | Obese to Non-Obese | 0.93 | 0.90, 0.96 | <0.001 | Obese to Non-Obese | 0.95 | 0.87, 1.04 | 0.3 | Obese to Non-Obese | 0.93 | 0.90, 0.96 | <0.001 |
|  | Non-Obese to Obese | 1.01 | 0.96, 1.07 | 0.6 | Non-Obese to Obese | 1.07 | 0.99, 1.17 | 0.092 | Non-Obese to Obese | 1.01 | 0.94, 1.09 | 0.7 |
|  | Stable Obesity | 1.26 | 1.06, 1.50 | 0.011 | Stable Obesity | 1.06 | 0.98, 1.14 | 0.13 | Stable Obesity | 1.24 | 1.01, 1.52 | 0.038 |

Abbreviations:95% CI: 95% confidence interval;OR: odd ratio; rf:reference. Model 1: no covariates were adjusted.Model 2: adjusted for covariates including gender, age, race/ethnicity, education level, poverty level, smoking status, and physical activity level; Model 3: further adjusted for comorbidities including diabetes mellitus, hypertension, and cardiovascular disease

**Supplementary Table 6:**sensitivity analyses of associations between CKD with weight change patterns across adulthood in NHANES 2011-2018, using MICE to impute missing data

|  | **age 25 years to baseline** | | | | **age 25 years to 10 years before baseline** | | | | **10 years before baseline to baseline** | | | |
| --- | --- | --- | --- | --- | --- | --- | --- | --- | --- | --- | --- | --- |
| **Group** | **Characteristic** | **OR** | **95% CI** | **p** | **Characteristic** | **OR** | **95% CI** | **p** | **Characteristic** | **OR** | **95% CI** | **p** |
| **model1** | Stable Non-Obese | rf | rf |  | Stable Non-Obese | rf | rf |  | Stable Non-Obese | rf | rf |  |
|  | Obese to Non-Obese | 1.8 | 1.21, 2.69 | 0.004 | Obese to Non-Obese | 1.53 | 0.90, 2.60 | 0.11 | Obese to Non-Obese | 1.97 | 1.55, 2.50 | <0.001 |
|  | Non-Obese to Obese | 1.39 | 1.24, 1.56 | <0.001 | Non-Obese to Obese | 1.62 | 1.41, 1.86 | <0.001 | Non-Obese to Obese | 1.29 | 1.09, 1.54 | 0.005 |
|  | Stable Obesity | 1.52 | 1.23, 1.88 | <0.001 | Stable Obesity | 1.57 | 1.28, 1.94 | <0.001 | Stable Obesity | 1.65 | 1.47, 1.85 | <0.001 |
| **model2** | Stable Non-Obese | rf | rf |  | Stable Non-Obese | rf | rf |  | Stable Non-Obese | rf | rf |  |
|  | Obese to Non-Obese | 1.65 | 1.04, 2.60 | 0.033 | Obese to Non-Obese | 1.28 | 0.66, 2.48 | 0.5 | Obese to Non-Obese | 1.57 | 1.24, 2.01 | <0.001 |
|  | Non-Obese to Obese | 1.47 | 1.28, 1.67 | <0.001 | Non-Obese to Obese | 1.42 | 1.23, 1.63 | <0.001 | Non-Obese to Obese | 1.47 | 1.21, 1.80 | <0.001 |
|  | Stable Obesity | 1.99 | 1.54, 2.56 | <0.001 | Stable Obesity | 1.88 | 1.47, 2.41 | <0.001 | Stable Obesity | 1.7 | 1.48, 1.96 | <0.001 |
| **model3** | Stable Non-Obese | rf | rf |  | Stable Non-Obese | rf | rf |  | Stable Non-Obese | rf | rf |  |
|  | Obese to Non-Obese | 1.26 | 0.78, 2.01 | 0.3 | Obese to Non-Obese | 1.04 | 0.53, 2.03 | >0.9 | Obese to Non-Obese | 1.17 | 0.93, 1.48 | 0.2 |
|  | Non-Obese to Obese | 1.09 | 0.95, 1.25 | 0.2 | Non-Obese to Obese | 1.03 | 0.89, 1.21 | 0.7 | Non-Obese to Obese | 1.16 | 0.94, 1.43 | 0.2 |
|  | Stable Obesity | 1.31 | 1.01, 1.69 | 0.039 | Stable Obesity | 1.29 | 1.00, 1.65 | 0.047 | Stable Obesity | 1.13 | 0.98, 1.31 | 0.1 |

Abbreviations:95% CI: 95% confidence interval;OR: odd ratio; rf:reference. Model 1: no covariates were adjusted.Model 2: adjusted for covariates including gender, age, race/ethnicity, education level, poverty level, smoking status, and physical activity level; Model 3: further adjusted for comorbidities including diabetes mellitus, hypertension, and cardiovascular disease

**Supplementary Table 7:** sensitivity analyses of associations between CKD with weight change patterns across adulthood in NHANES 2011-2018, adjusted for exclusions of missing data.

|  | **age 25 years to baseline** | | | | **age 25 years to 10 years before baseline** | | | | **10 years before baseline to baseline** | | | |
| --- | --- | --- | --- | --- | --- | --- | --- | --- | --- | --- | --- | --- |
| **Group** | **Characteristic** | **OR** | **95% CI** | **p** | **Characteristic** | **OR** | **95% CI** | **p** | **Characteristic** | **OR** | **95% CI** | **p** |
| model1 | Stable Non-Obese | — | — |  | Stable Non-Obese | — | — |  | Stable Non-Obese | — | — |  |
|  | Obese to Non-Obese | 1.94 | 1.01, 3.70 | 0.046 | Obese to Non-Obese | 1.89 | 0.73, 4.92 | 0.2 | Obese to Non-Obese | 2.38 | 1.67, 3.40 | <0.001 |
|  | Non-Obese to Obese | 1.29 | 1.06, 1.58 | 0.012 | Non-Obese to Obese | 1.86 | 1.50, 2.31 | <0.001 | Non-Obese to Obese | 1.1 | 0.76, 1.58 | 0.6 |
|  | Stable Obesity | 1.46 | 0.96, 2.22 | 0.078 | Stable Obesity | 1.66 | 1.15, 2.39 | 0.008 | Stable Obesity | 1.69 | 1.40, 2.03 | <0.001 |
| model2 | Stable Non-Obese | — | — |  | Stable Non-Obese | — | — |  | Stable Non-Obese | — | — |  |
|  | Obese to Non-Obese | 2.15 | 1.03, 4.49 | 0.042 | Obese to Non-Obese | 2.4 | 0.68, 8.40 | 0.2 | Obese to Non-Obese | 2.06 | 1.38, 3.07 | <0.001 |
|  | Non-Obese to Obese | 1.28 | 1.02, 1.60 | 0.034 | Non-Obese to Obese | 1.62 | 1.29, 2.05 | <0.001 | Non-Obese to Obese | 1.19 | 0.79, 1.79 | 0.4 |
|  | Stable Obesity | 1.9 | 1.16, 3.13 | 0.013 | Stable Obesity | 2 | 1.30, 3.09 | 0.003 | Stable Obesity | 1.66 | 1.34, 2.07 | <0.001 |
| model3 | Stable Non-Obese | — | — |  | Stable Non-Obese | — | — |  | Stable Non-Obese | — | — |  |
|  | Obese to Non-Obese | 1.6 | 0.76, 3.36 | 0.2 | Obese to Non-Obese | 2.17 | 0.69, 6.88 | 0.2 | Obese to Non-Obese | 1.55 | 1.06, 2.26 | 0.025 |
|  | Non-Obese to Obese | 0.98 | 0.76, 1.26 | 0.9 | Non-Obese to Obese | 1.25 | 0.95, 1.64 | 0.1 | Non-Obese to Obese | 0.96 | 0.64, 1.42 | 0.8 |
|  | Stable Obesity | 1.27 | 0.74, 2.17 | 0.4 | Stable Obesity | 1.37 | 0.85, 2.20 | 0.2 | Stable Obesity | 1.16 | 0.87, 1.54 | 0.3 |

Abbreviations:95% CI: 95% confidence interval;OR: odd ratio; rf:reference. Model 1: no covariates were adjusted.Model 2: adjusted for covariates including gender, age, race/ethnicity, education level, poverty level, smoking status, and physical activity level; Model 3: further adjusted for comorbidities including diabetes mellitus, hypertension, and cardiovascular disease

**Supplementary Table 8:**sensitivity analyses of associations between CKD with weight change patterns across adulthood in NHANES 2011-2018, redefining the weight change patterns based on the percentage of absolute body weight change.

|  | **age 25 years to baseline** | | | | **age 25 years to 10 years before baseline** | | | | **10 years before baseline to baseline** | | | |
| --- | --- | --- | --- | --- | --- | --- | --- | --- | --- | --- | --- | --- |
| **Group** | **Characteristic** | **OR** | **95% CI** | **p** | **Characteristic** | **OR** | **95% CI** | **p** | **Characteristic** | **OR** | **95% CI** | **p** |
| model1 | < 5% Weight Change | — | — |  | < 5% Weight Change | — | — |  | < 5% Weight Change | — | — |  |
|  | 5% to 10% Weight Gain | 0.74 | 0.56, 0.97 | 0.028 | 5% to 10% Weight Gain | 0.99 | 0.78, 1.26 | >0.9 | 5% to 10% Weight Gain | 0.83 | 0.67, 1.03 | 0.092 |
|  | 5% to 10% Weight Loss | 1.27 | 0.89, 1.81 | 0.2 | 5% to 10% Weight Loss | 1.02 | 0.54, 1.94 | >0.9 | 5% to 10% Weight Loss | 1.45 | 1.18, 1.79 | <0.001 |
|  | ≥ 10% Weight Gain | 1.13 | 0.93, 1.38 | 0.2 | ≥ 10% Weight Gain | 1.49 | 1.30, 1.71 | <0.001 | ≥ 10% Weight Gain | 0.98 | 0.85, 1.14 | 0.8 |
|  | ≥ 10% Weight Loss | 1.56 | 1.18, 2.06 | 0.002 | ≥ 10% Weight Loss | 1.96 | 0.84, 4.55 | 0.12 | ≥ 10% Weight Loss | 1.87 | 1.57, 2.24 | <0.001 |
| model2 | < 5% Weight Change | — | — |  | < 5% Weight Change | — | — |  | < 5% Weight Change | — | — |  |
|  | 5% to 10% Weight Gain | 0.73 | 0.48, 1.12 | 0.15 | 5% to 10% Weight Gain | 0.93 | 0.69, 1.26 | 0.6 | 5% to 10% Weight Gain | 0.91 | 0.67, 1.22 | 0.5 |
|  | 5% to 10% Weight Loss | 1.02 | 0.67, 1.55 | >0.9 | 5% to 10% Weight Loss | 0.61 | 0.23, 1.62 | 0.3 | 5% to 10% Weight Loss | 1.48 | 1.13, 1.95 | 0.007 |
|  | ≥ 10% Weight Gain | 1.09 | 0.83, 1.42 | 0.5 | ≥ 10% Weight Gain | 1.37 | 1.13, 1.67 | 0.003 | ≥ 10% Weight Gain | 1.16 | 0.94, 1.43 | 0.2 |
|  | ≥ 10% Weight Loss | 1.15 | 0.80, 1.65 | 0.4 | ≥ 10% Weight Loss | 1.54 | 0.62, 3.82 | 0.3 | ≥ 10% Weight Loss | 1.57 | 1.26, 1.97 | <0.001 |
| model3 | < 5% Weight Change | — | — |  | < 5% Weight Change | — | — |  | < 5% Weight Change | — | — |  |
|  | 5% to 10% Weight Gain | 0.64 | 0.41, 1.01 | 0.054 | 5% to 10% Weight Gain | 0.95 | 0.70, 1.31 | 0.8 | 5% to 10% Weight Gain | 0.87 | 0.62, 1.22 | 0.4 |
|  | 5% to 10% Weight Loss | 0.97 | 0.61, 1.55 | 0.9 | 5% to 10% Weight Loss | 0.62 | 0.23, 1.69 | 0.3 | 5% to 10% Weight Loss | 1.35 | 1.01, 1.81 | 0.046 |
|  | ≥ 10% Weight Gain | 0.88 | 0.67, 1.16 | 0.3 | ≥ 10% Weight Gain | 1.11 | 0.92, 1.35 | 0.3 | ≥ 10% Weight Gain | 1.04 | 0.82, 1.32 | 0.7 |
|  | ≥ 10% Weight Loss | 0.94 | 0.65, 1.35 | 0.7 | ≥ 10% Weight Loss | 1.43 | 0.56, 3.64 | 0.4 | ≥ 10% Weight Loss | 1.28 | 1.01, 1.64 | 0.043 |

Abbreviations:95% CI: 95% confidence interval;OR: odd ratio; rf:reference. Model 1: no covariates were adjusted.Model 2: adjusted for covariates including gender, age, race/ethnicity, education level, poverty level, smoking status, and physical activity level; Model 3: further adjusted for comorbidities including diabetes mellitus, hypertension, and cardiovascular disease
